# Supplementary material for: Application of ferrocene-resorcinarene in silver nanoparticle synthesis
Source: Royal Society of Chemistry journal article supplement (doi:10.1039/c6ra19961e), 2016-01-01
Supplement: c6ra19961e1.pdf [file c6ra19961e1.pdf]

## Electronic Supplementary Information (ESI)

### Application of ferrocene-resorcinarene in the silver nanoparticles synthesis

Tatiana Yu. Sergeeva,<sup>a,b</sup> Aida I. Samigullina,<sup>a</sup> Aidar T. Gubaidullin,<sup>a</sup> Irek R. Nizameev,<sup>a</sup> Marsil K. Kadirov,<sup>a</sup> Rezeda K. Mukhitova,<sup>a</sup> Albina Y. Ziganshina<sup>a,b\*</sup> and Alexander I. Konovalov<sup>a,b</sup>

<sup>a</sup> Department of Supramolecular Chemistry, A.E. Arbutov Institute of Organic and Physical Chemistry, Kazan Scientific Center, Russian Academy of Sciences, Arbuzov str. 8, Kazan 420088, Russia. E-mail: az@iopc.ru.

<sup>b</sup> A.M. Butlerov Institute of Chemistry, Kazan Federal University, Kremlevskaya str. 18, Kazan 420018, Russia.

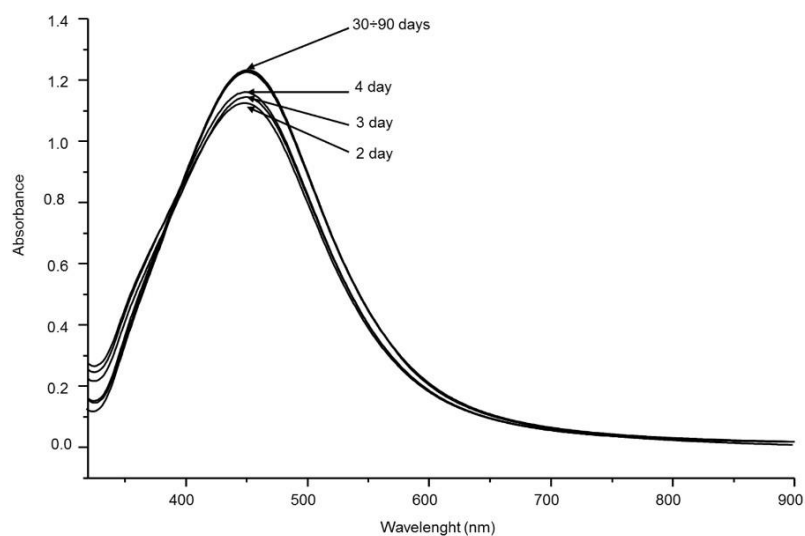

**Fig. S1** UV-Vis spectra of the mixture of AgNO<sub>3</sub> and FcCA being reacted from 2 to 90 days ( $C(\text{AgNO}_3) = 0.25 \text{ mM}$ ,  $C(\text{FcCA}) = 0.025 \text{ mM}$ ,  $25 \text{ }^\circ\text{C}$ ,  $\text{H}_2\text{O}$ ,  $l = 1 \text{ cm}$ ).

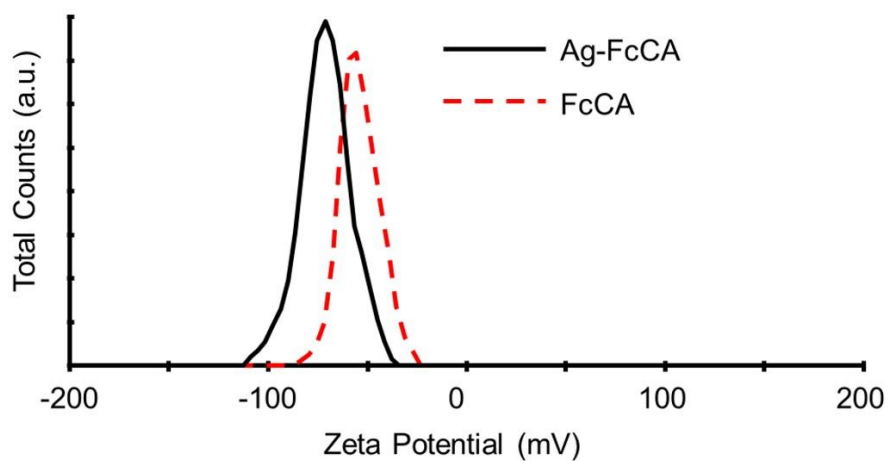

**Fig. S2** Zeta potentials of Ag<sub>10</sub>-FcCA (C = 0.09 mg/ml) and FcCA (C = 0.1 mM) (H<sub>2</sub>O, 25 °C).

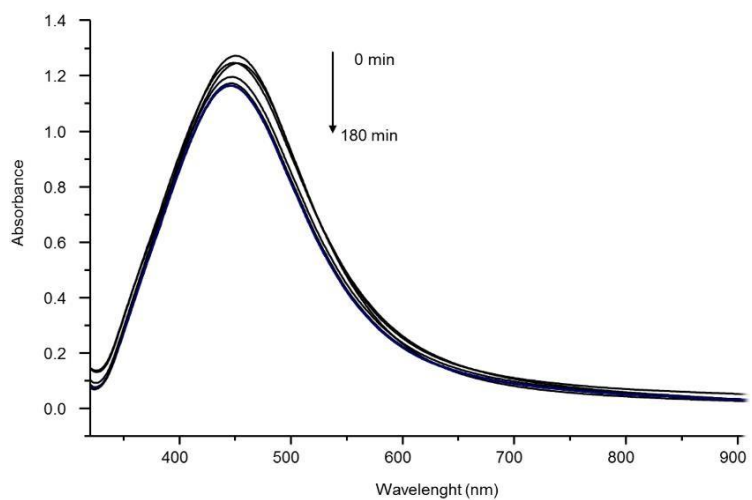

**Fig. S3** Ag<sub>10</sub>-FcCA UV-spectra changes upon irradiation with 450 nm (C = 0.9 mg/ml, 25 °C, H<sub>2</sub>O, l = 1 cm).

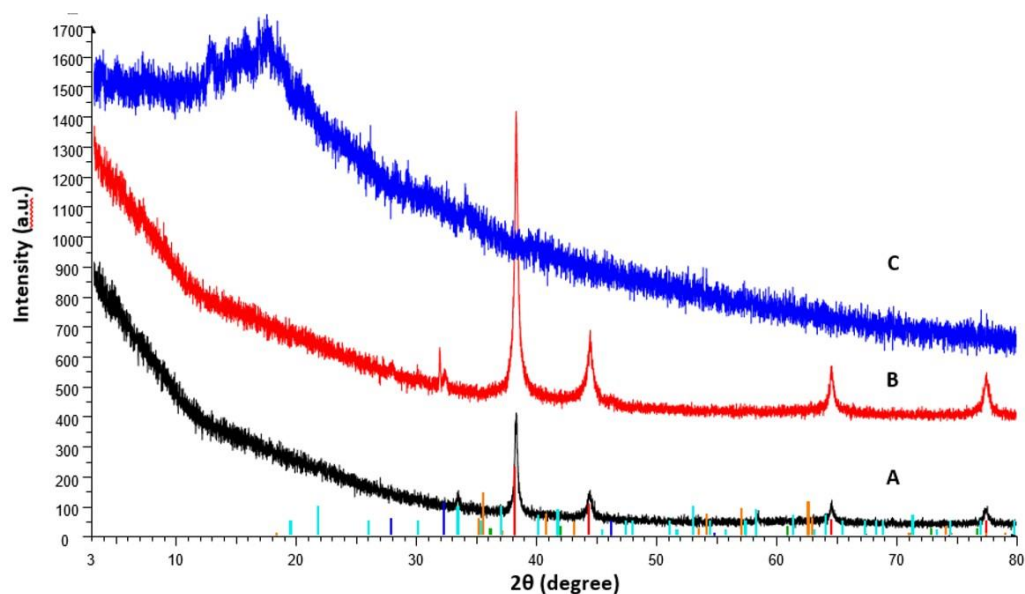

**Fig. S4.** Experimental diffraction patterns of (A)  $\text{Ag}_{10}\text{-FcCA}$ , (B)  $\text{Ag}_{30}\text{-FcCA}$  and (C) the ferrocene-containing resorcinarene FcCA. Red vertical lines show the position of the interference peaks corresponding to a crystalline silver (Silver, syn., No. 01-087-0720 in the PDF database); dark blue lines correspond to AgBr, syn., No. 01-079-0149; light blue lines correspond to Goethite,  $\text{Fe}_2\text{O}_3 \cdot \text{H}_2\text{O}$ , No. 00-002-0281; green lines correspond to Wustite, FeO, No. 00-002-1180; orange lines correspond to Magnetite,  $\text{Fe}_3\text{O}_4$ , No. 00-001-1111.

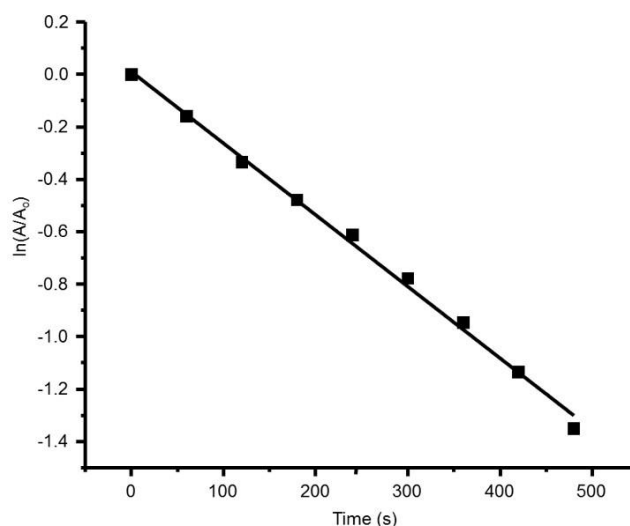

**Fig. S5** Plot of  $\ln[A/A_0]$  against time for the reduction of 4-NP by  $\text{NaBH}_4$  in the presence of 40 nanomoles of  $\text{Ag}_{10}\text{-FcCA}$  ( $C(\text{pNPh}) = 0.113 \text{ mM}$ ,  $C(\text{NaBH}_4) = 0.5 \text{ M}$ ,  $\text{H}_2\text{O}$ ,  $25 \text{ }^\circ\text{C}$ ,  $l = 0.5 \text{ cm}$ ).
